# Supplementary material
Source: HighWire-hosted journal article supplement (https://jnm.snmjournals.org/highwire/filestream/95486/field_highwire_adjunct_files/0/216820_Supplemental_Data.pdf)
Supplement: 216820_Supplemental_Data.pdf [file 216820_Supplemental_Data.pdf]

**SUPPLEMENTAL TABLE 1: Univariate analysis and multivariable analysis of overall survival and radiographic progression free survival in the entire cohort**

|                                                                                   | Univariate analysis |         |                                        |         | Multivariable analysis* |         |                                        |         |
|-----------------------------------------------------------------------------------|---------------------|---------|----------------------------------------|---------|-------------------------|---------|----------------------------------------|---------|
|                                                                                   | Overall survival    |         | Radiographic progression free survival |         | Overall survival        |         | Radiographic progression free survival |         |
|                                                                                   | HR (95% CI)         | p value | HR (95% CI)                            | p value | HR (95% CI)             | p value | HR (95% CI)                            | p value |
| <b>Age: &gt; 70 yrs</b>                                                           | 1.02 (0.65-1.59)    | 0.931   | 0.77 (0.55-1.09)                       | 0.143   | NA                      | NA      | 1.07 (0.74-1.55)                       | 0.724   |
| <b>Karnofsky Performance Status: ≤ 80</b>                                         | 2.79 (1.70-4.58)    | <0.001  | 1.18 (0.84-1.67)                       | 0.343   | 1.83 (1.07-3.14)        | 0.028   | NA                                     | NA      |
| <b>Baseline PSA: &gt; 60 ng/mL</b>                                                | 3.15 (1.97-5.04)    | <0.001  | 1.92 (1.35-2.74)                       | <0.001  | 1.27 (0.73-2.21)        | 0.399   | 1.09 (0.71-1.68)                       | 0.697   |
| <b>Time from diagnosis to first <sup>177</sup>Lu-PRLT treatment: &gt; 5 years</b> | 0.56 (0.36-0.87)    | 0.010   | 0.57 (0.40-0.80)                       | 0.001   | 0.61 (0.38-0.97)        | 0.037   | 0.54 (0.37-0.78)                       | 0.001   |
| <b>Cumulative administered activity: &gt; 16 GBq</b>                              | 0.36 (0.23-0.57)    | <0.001  | 0.82 (0.58-1.16)                       | 0.265   | 0.50 (0.31-0.81)        | 0.005   | NA                                     | NA      |
| <b>Bone metastases: yes</b>                                                       | 5.90 (2.15-16.19)   | 0.001   | 1.84 (1.10-3.07)                       | 0.019   | 2.32 (0.81-6.69)        | 0.119   | 1.07 (0.61-1.87)                       | 0.815   |
| <b>Visceral metastases: yes</b>                                                   | 2.24 (1.40-3.59)    | 0.001   | 1.90 (1.28-2.84)                       | 0.002   | 1.69 (1.02-2.80)        | 0.042   | 1.46 (0.96-2.23)                       | 0.080   |
| <b>Baseline haemoglobin: ≤ 7.5 mmol/L</b>                                         | 4.27 (2.60-6.99)    | <0.001  | 2.21 (1.55-3.15)                       | <0.001  | 2.06 (1.18-3.58)        | 0.011   | 1.55 (1.01-2.37)                       | 0.043   |
| <b>Baseline ALP*: ≥ 220 U/L</b>                                                   | 3.96 (2.44-6.44)    | <0.001  | 3.04 (2.04-4.52)                       | <0.001  | 1.83 (1.08-3.10)        | 0.024   | 2.13 (1.35-3.37)                       | 0.001   |
| <b>Taxane Chemotherapy: yes</b>                                                   | 2.55 (1.60-4.06)    | <0.001  | 1.71 (1.20-2.43)                       | 0.003   | 1.53 (0.88-2.67)        | 0.134   | 1.26 (0.84-1.89)                       | 0.263   |

\*Data available for 166 patients
